# Supplementary material for: New reaction of dithiophosphoric acids with O-thioacylhydroxylamines. Nucleophilic substitution or single electron transfer process?
Source: Royal Society of Chemistry journal article supplement (doi:10.1039/b203619n), 2002-01-01
Supplement: b203619n.pdf [file b203619n.pdf]

## Supplementary materials

Spectra of the reaction mixtures demonstrating influence of radical traps on the yield of investigated reaction; spectra illustrating photochemical stability of *O*-thioacyl hydroxylamines.

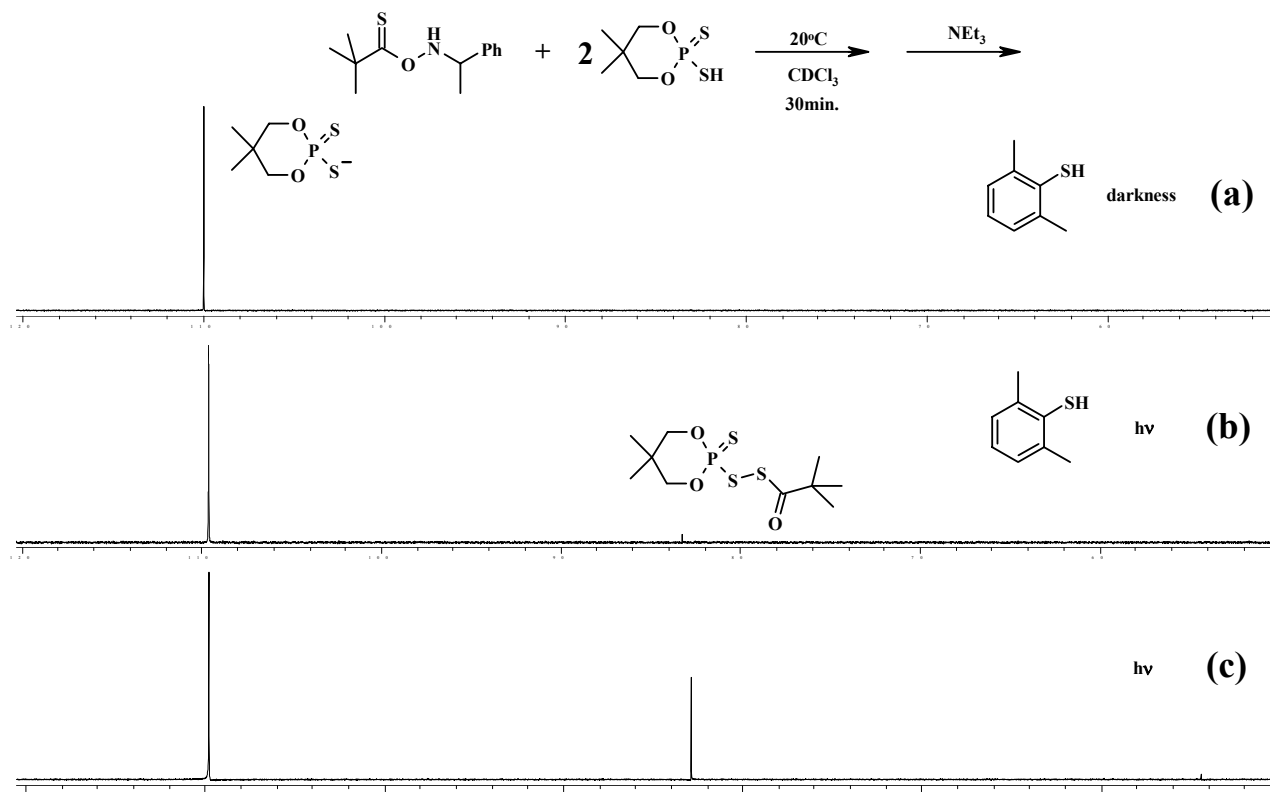

**Figure S1.** <sup>31</sup>P NMR spectra of reaction mixtures formed from *O*-thiopivaloyl *N*-1-phenylethylhydroxylamine **7c** and dithiophosphoric acid **1** in the presence of 1,6-dimethylthiophenol at different experimental conditions.

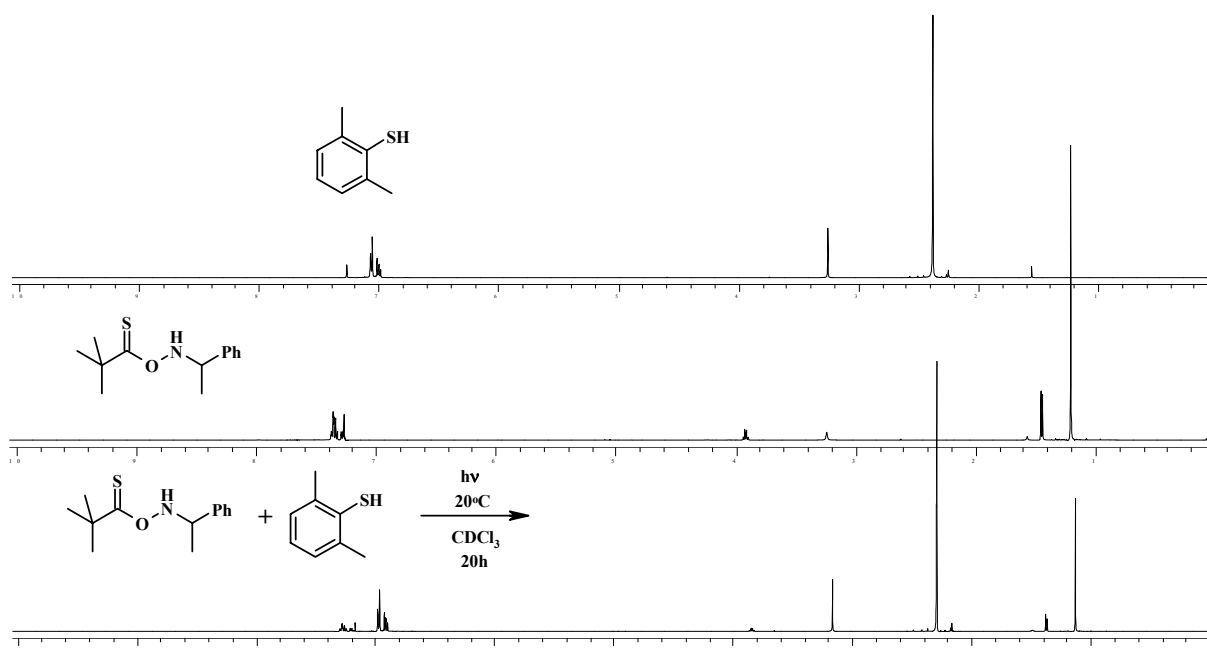

**Figure S2.**  $^1\text{H}$  NMR spectrum of the reaction mixture formed after irradiation of *O*-thiopivaloyl *N*-1-phenylethylhydroxylamine **7c** in the presence of thiophenol **14**. Comparison with the starting materials.

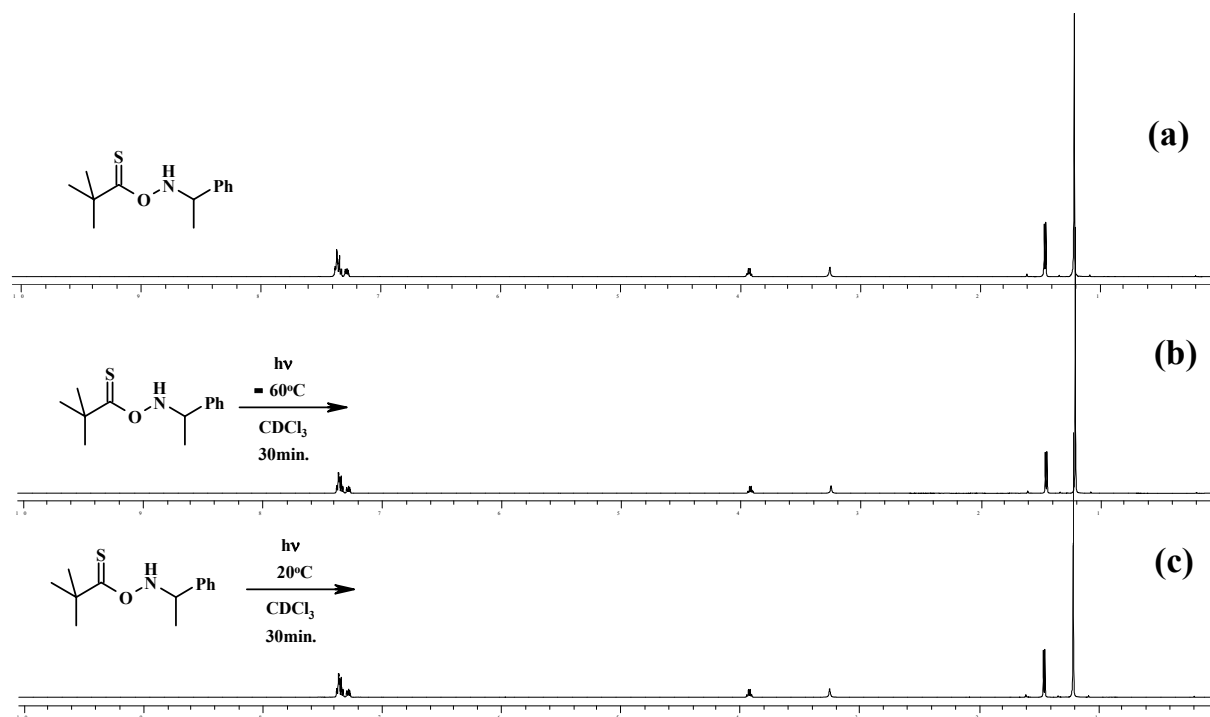

**Figure S3.**  $^1\text{H}$  NMR spectra of the reaction mixtures formed after irradiation of *O*-thiopivaloyl *N*-1-phenylethylhydroxylamine **7c**. Comparison with the starting material.
